# Supplementary material for: A multi-disciplinary analysis of the exceptional flood event of July 2021 in central Europe – Part 1: Event description and analysis
Source: Copernicus journal article supplement (doi:10.5194/nhess-23-525-2023), 2023-02-06
Supplement: Supplementary file 1 [file nhess-23-525-2023-supplement.pdf]

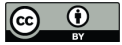

*Supplement of*

**A multi-disciplinary analysis of the exceptional  
flood event of July 2021 in central Europe  
– Part 1: Event description and analysis**

**Susanna Mohr et al.**

*Correspondence to:* Susanna Mohr (mohr@kit.edu)

The copyright of individual parts of the supplement might differ from the article licence.

# Supplementary Material

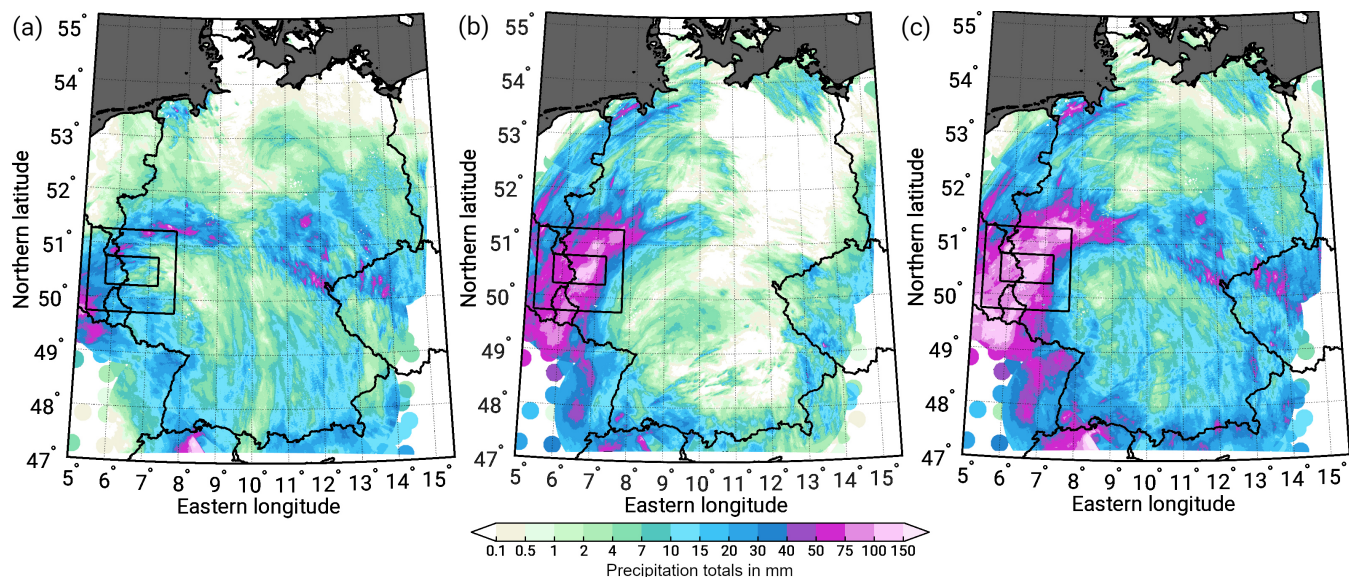

**Figure S1.** Precipitation totals based on RADOLAN data for (a) the 24 h period from 13 July 2021 05:50 UTC to 14 July 2021 05:50 UTC, and (b) 24 h precipitation totals from 14 July 05:50 UTC to 15 July 2021 05:50 UTC, and (c) the 48 h period from 13 July 2021 05:50 UTC to 15 July 2021 05:50 UTC for whole Germany. The larger black rectangle indicates the region named LReg, the smaller black rectangle the region named SReg (cf. also PART2).

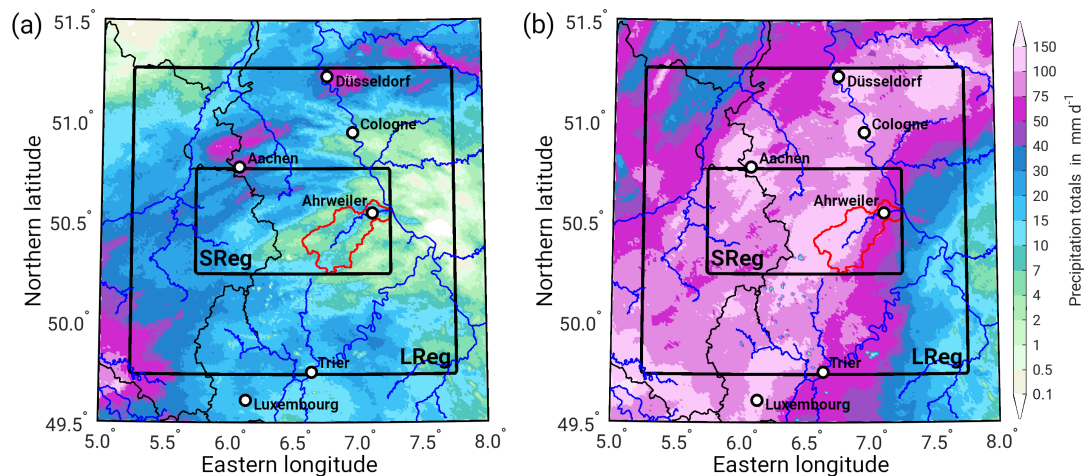

**Figure S2.** (a) As Fig. S1a and (b) as Fig. S1c, only zoomed in. On average, the 48 h precipitation totals was 74.4 mm for LReg and 91.1 mm for SReg. In addition, the red contour outlines the Ahr catchment; main rivers are given in blue.

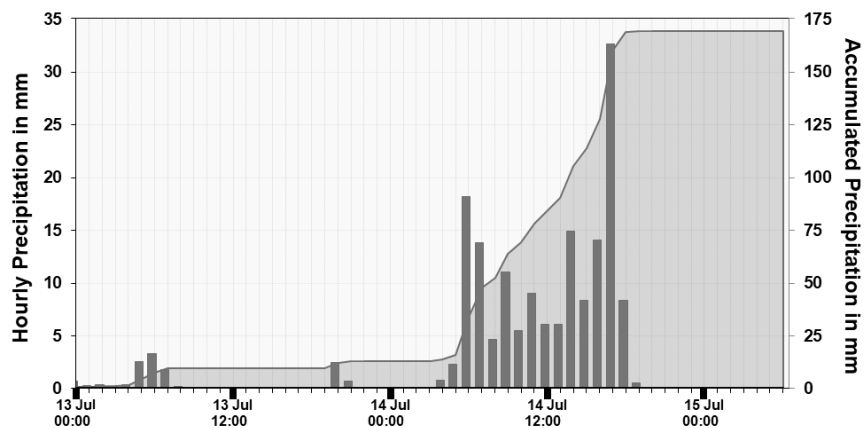

**Figure S3.** Time series of hourly precipitation (bars) in mm (y-axis left) and accumulative precipitation (line) in mm (y-axis right) at the DWD station Cologne-Stammheim from 13 July 2021 00:00 UTC to 15 July 2021 06:00 UTC.

**Table S1.** 24 h precipitation totals above 100 mm on 14 July 2021 (14 July 2021 05:50 UTC to 15 July 2021 05:50 UTC) based on DWD stations in the federal states North Rhine-Westphalia (NRW) and Rhineland-Palatinate (RP). Msl means meters above mean sea level.

| Station               | Measuring height in msl | Fed. state | Prec. totals in mm |
|-----------------------|-------------------------|------------|--------------------|
| Cologne-Stammheim     | 43                      | NRW        | 153.5              |
| Kall-Sistig           | 505                     | NRW        | 144.8              |
| Dahlem-Schmidtheim    | 573                     | NRW        | 129.2              |
| Schneifelforsthaus    | 649                     | RP         | 124.1              |
| Lissendorf            | 407                     | RP         | 119.4              |
| Gerolstein            | 530                     | RP         | 116.6              |
| Alfter-Volmershoven   | 160                     | NRW        | 114.6              |
| Lüdenscheid           | 387                     | NRW        | 114.4              |
| Weilerswist-Lommersum | 147                     | NRW        | 113.9              |
| Wipperfürth-Gardeweg  | 360                     | NRW        | 111.8              |
| Blankenheim-Ahrhütte  | 402                     | NRW        | 111.2              |
| Wermelskirchen        | 244                     | NRW        | 107.0              |
| Cologne-Bonn          | 92                      | NRW        | 106.9              |

1090 **Heavy rain catalog: KOSTRA-DWD-2010R**

With KOSTRA-DWD-2010R data (*Koordinierte Starkniederschlagsregionalisierung und -auswertung*; Malitz and Ertel, 2015; Junghänel et al., 2017), the DWD provides a tool that allows statements about the intensity and occurrence probabilities of heavy precipitation events at any location in Germany. KOSTRA-DWD-2010R is a gridded data set of precipitation statistics with a grid resolution of about  $8 \times 8 \text{ km}^2$ . For each grid cell, precipitation statistics for different duration levels from 5 minutes to 72 hours and return periods ranging from 1 year to 100 years are included. KOSTRA-DWD-2010R is based on interpolated station data for duration levels below 24 hours and on HYRAS-DE above. It is commonly used in Germany as a calculation basis for precipitation runoff and the dimensioning of facilities. Figure S4 shows the return periods of 24 h precipitation totals on 14 July 2021 based on this catalog.

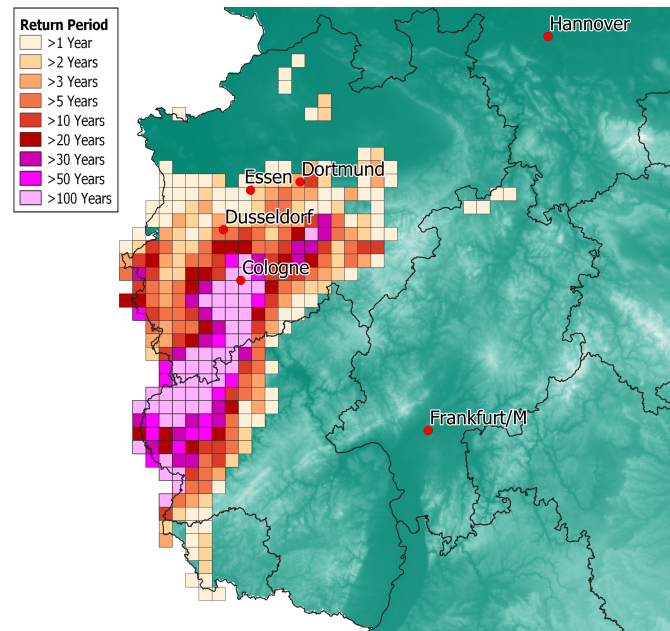

**Figure S4.** Return periods of 24 h precipitation totals based on KOSTRA-DWD-2010R (14 July 2021 05:50 UTC to 15 July 2021 05:50 UTC).



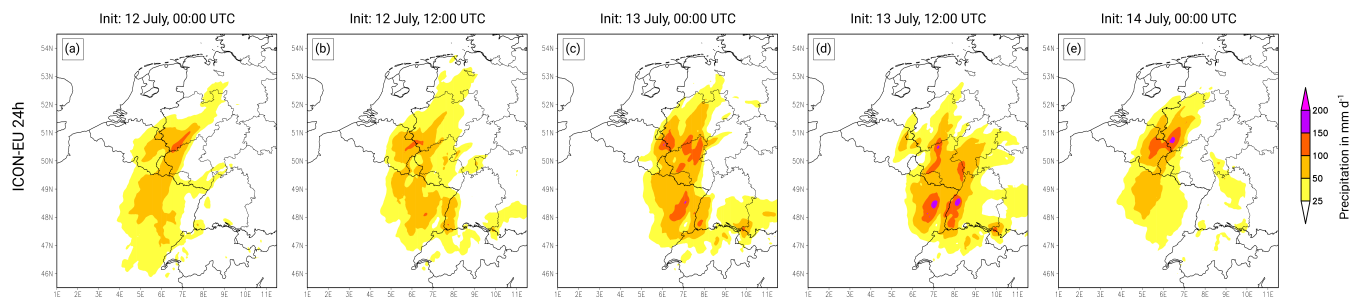

**Figure S5.** 24 h precipitation forecasts (14 July 2021 06:00 UTC to 15 July 2021 06:00 UTC) for ICON-EU for different initialization times (a: 12 July 2021 00:00 UTC; b: 12 July 2021 12:00 UTC; c: 13 July 2021 00:00 UTC; d: 13 July 2021 12:00 UTC; e: 14 July 2021 00:00 UTC).

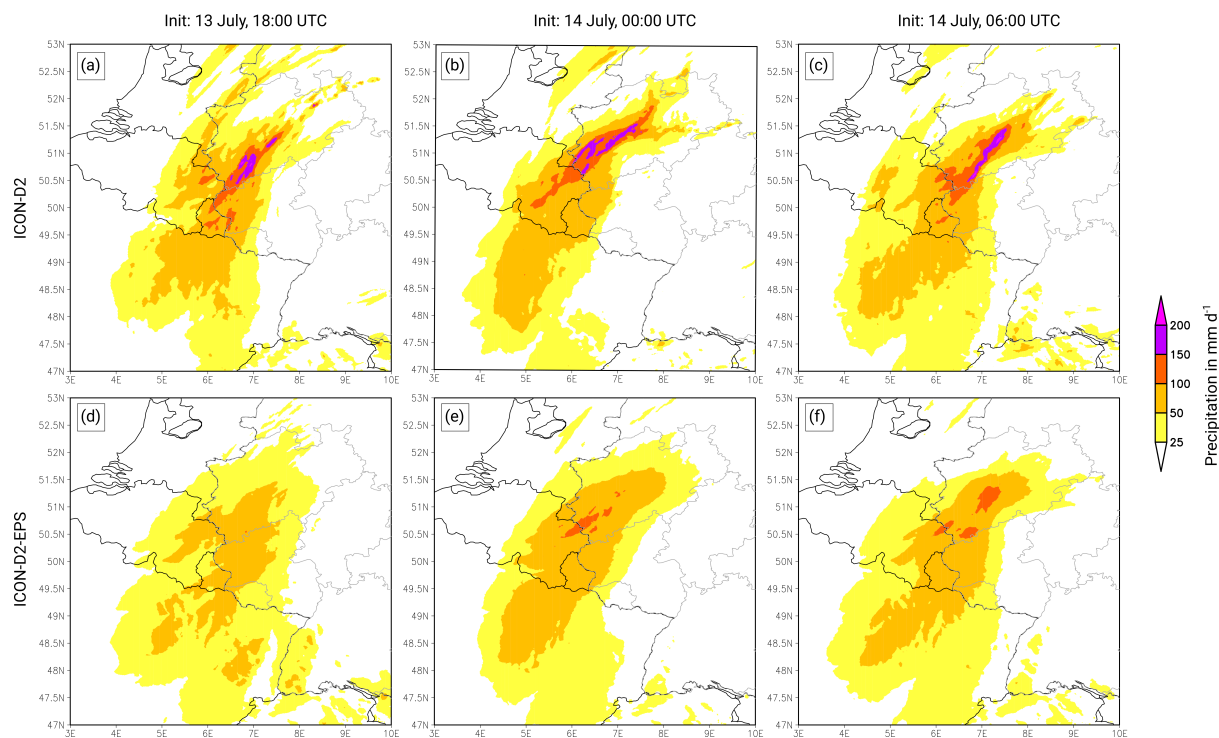

**Figure S6.** 24 h precipitation forecasts (14 July 2021 06:00 UTC to 15 July 2021 06:00 UTC) for ICON-D2 (a)-(c) and ICON-D2-EPS (d)-(f) for different initialization times (a, d: 13 July 2021 18:00 UTC; b, e: 14 July 2021 00:00 UTC; c, f: 14 July 2021 06:00 UTC).

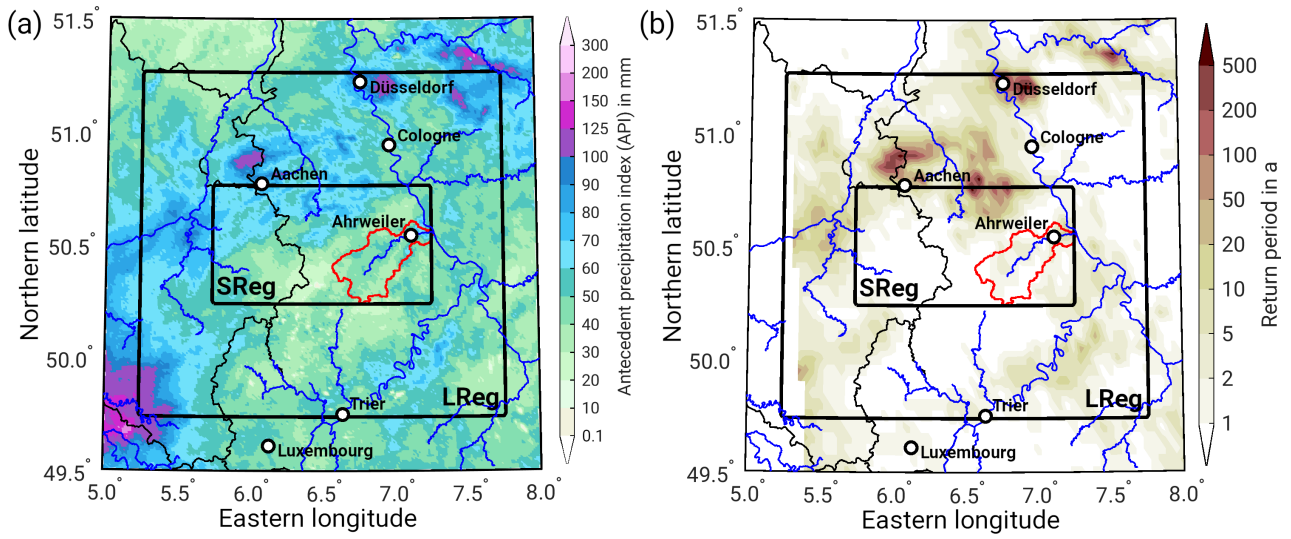

**Figure S7.** Preconditions with (a) Antecedent Precipitation Index (API) until 14 July 2021 05:50 UTC derived from RADOLAN, and (b) statistical return periods of (a). The spatial average of the return period is 1.5 years for LReg and 1.1 years for SReg. Note that the RADOLAN data have been remapped to the 5 km HYRAS grid in (b) as the climatological values are taken from HYRAS (reference period: 1951 to 2015). Black rectangles represent the LReg and SReg domain; the red contour outlines the Ahr catchment; main rivers are given in blue.

**Table S2.** Fatalities, total estimated losses, and insured damage including references with release date. The abbreviation Gov. stands for the German government. Note that all damage estimations for Germany (unless otherwise stated) also include damage from the federal states of Bavaria and Saxony, which were also associated with the low-pressure system *Bernd*.

| Entity              | Fatalities | Total Damage              | Insured Damage          | Reference             | Release date |
|---------------------|------------|---------------------------|-------------------------|-----------------------|--------------|
| <b>CEDIM FDA</b>    | 194        | EUR 11–29 bn <sup>3</sup> | EUR 5–10 bn             | Schäfer et al. (2021) | 20.07.2021   |
| GDV Vers. 2         |            |                           | EUR 8.2 bn              | GDV (2021b)           | 29.12.2021   |
|                     |            |                           | EUR 7.7 bn (property)   |                       |              |
| GDV Vers. 1         |            |                           | EUR 6.95 bn             | GDV (2021a)           | 06.10.2021   |
|                     |            |                           | EUR 6.5 bn (buildings)  |                       |              |
| Gov.: Total Vers. 2 | 183        | EUR 32.05 bn              |                         | BMI (2022)            | 03.2022      |
| Gov.: Total Vers. 1 |            | EUR 30 bn                 |                         | BMI (2021)            | 28.09.2021   |
| MunichRe            |            | EUR 33 bn <sup>1</sup>    | EUR 8.2 bn <sup>1</sup> | Munich Re (2022)      | 01.2022      |
|                     |            | EUR 46 bn <sup>2</sup>    | EUR 11 bn <sup>2</sup>  |                       |              |
| Aon                 | 197        | EUR 31.5 bn               |                         | Podlaha et al. (2022) | 01.2022      |
| CATDAT              |            | EUR 33.6 bn               | EUR 8 bn                | EEA (2022)            | 31.12.2021   |
| SwissRe             |            | USD 40+ bn <sup>2</sup>   |                         | Swiss Re (2021)       | 14.12.2021   |
| Deutsche Rück       |            | EUR 40–50 bn              | EUR 8.2 bn <sup>1</sup> | Deutsche Rück (2021)  | 04.08.2021   |
|                     |            |                           | EUR 11 bn <sup>2</sup>  |                       |              |

<sup>1</sup>Germany; <sup>2</sup>All countries; <sup>3</sup>Incl. buildings, infrastructure, production

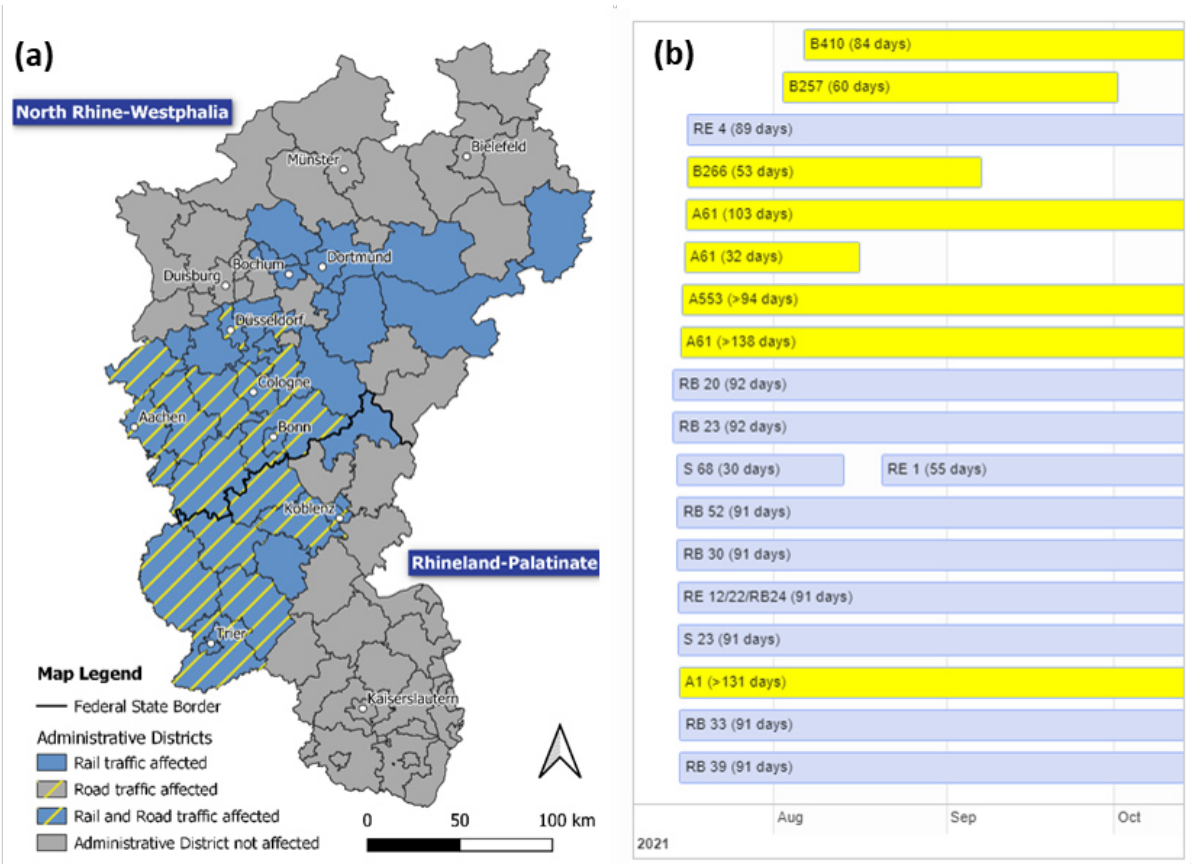

**Figure S8.** (a) Affected rail and road infrastructure as in different administrative districts in NRW and RP. If any rail track (i.e. *Regionalbahn*, RB; *Regional-Express*, RE; *S-Bahn*, S) or highway (i.e., *Autobahn*, A, or *Bundesstraße*, B) within the district is affected, the district is counted as affected; and (b) timeline of rail (blue) and large road (yellow) disruptions, regardless of the severity and including flood-induced construction work, with a duration of > 25 days. Roads or rail lines are listed separately if different time frames are involved.
